# Supplementary figures and images for: Synthesis, Spectroscopic, and Theoretical Study of Copper and Cobalt Complexes with Dacarbazine
Source: MDPI journal article supplement (doi:10.3390/ma14123274), 2021-06-13

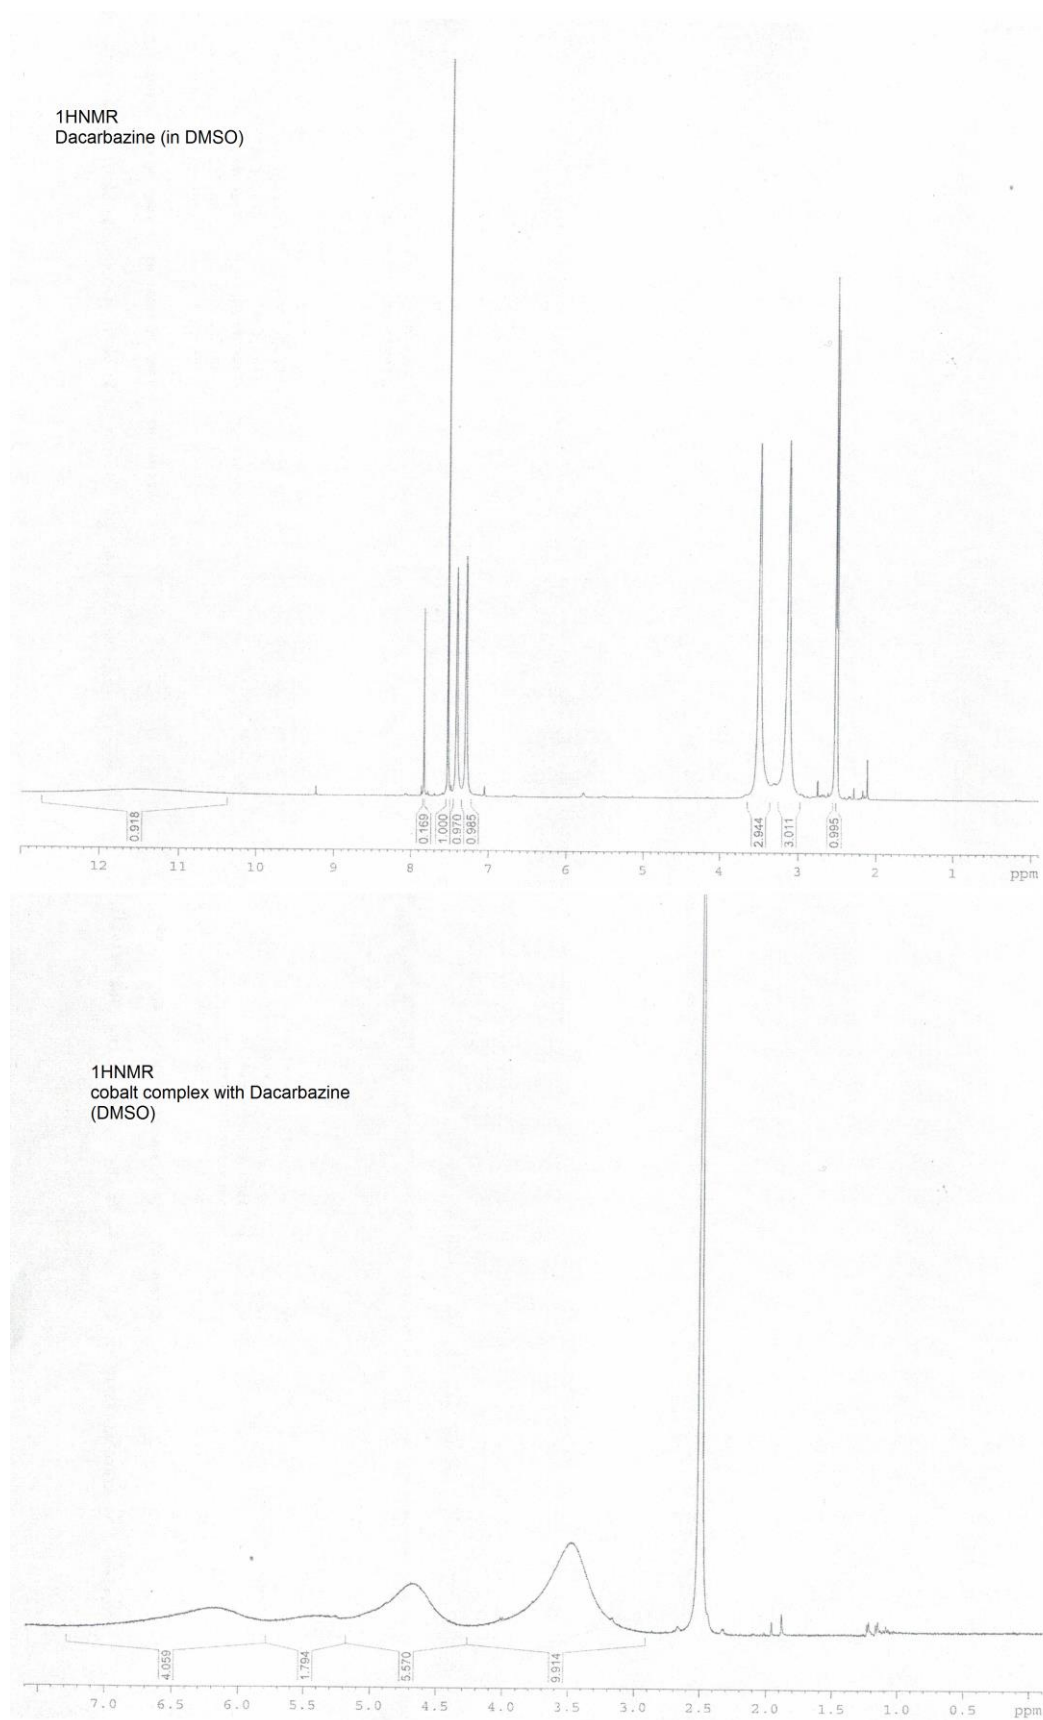

**Figure S1.** <sup>1</sup>HNMR spectra for dacarbazine and dacarbazine complex with cobalt (II).

Supplement: s1 [file s1]
